# Supplementary material
Source: Research Square preprint supplement (doi:10.21203/rs.3.rs-8910622/v1)
Supplement: Supplementary file 1 [file a4c38fe0b00d5765515c3560.docx]

Expanding the host range: West Nile virus and Usutu virus infections in wild carnivores in the Netherlands.

Nnomzie C. Atamaa, Cora M. Holickia, Emmanuelle Müngera, Anne van der Lindena, Gianfilippo Aglianib,Felicity D. Chandlera, Irina V. Chestakovaa, Jasja J.A. Dekker c, Bob Jonge Poerink d, Ruby Wagensveld b, Bas B. Oude Munninka, Marion G. Koopmansa, Judith M. A. van den Brandb, e# & Reina S. Sikkemaa*#

**Supplementary information**

**s1.** **Carnivores positive for USUV RNA and detections across sample types**

**
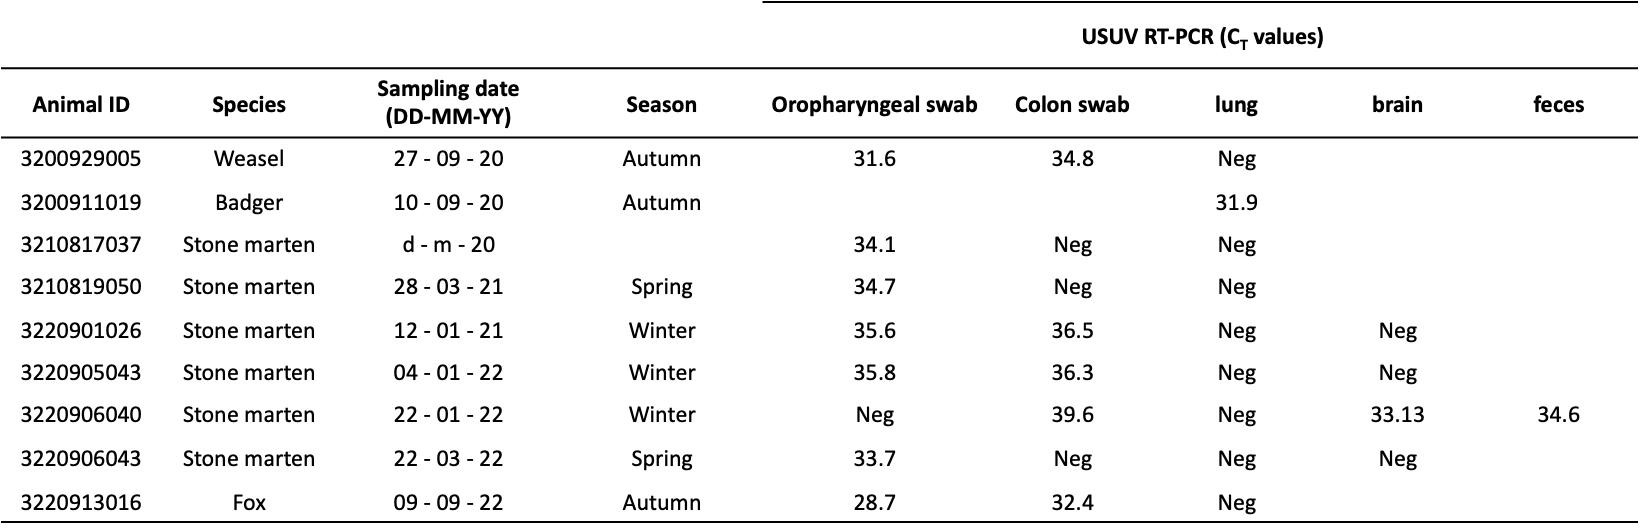
**
